# Supplementary material for: Design of “turn-off” luminescent Ln-MOFs for sensitive detection of cyanide anions
Source: Royal Society of Chemistry journal article supplement (doi:10.1039/d2dt01844f), 2022-01-01
Supplement: d2dt01844f1.pdf [file d2dt01844f1.pdf]

## Supporting Information

### Design of “turn-off” luminescent Ln-MOFs for sensitive detection of cyanide anion

Weisai Liu,<sup>a,b,c</sup> Fei Wang,<sup>\*a,b,c</sup> Xiaoyi Chen,<sup>c</sup> Wenke Zhi,<sup>c</sup> Xuquan Wang,  
<sup>c</sup> Baoqiang Xu<sup>a</sup> and Bin Yang<sup>a</sup>

- a. National Engineering Research Center of Vacuum Metallurgy, Kunming 650093, China.
- b. Key Laboratory of Vacuum Metallurgy for Nonferrous Metal of Yunnan Province, Kunming 650093, China
- c. Faculty of Metallurgical and Energy Engineering, Kunming University of Science and Technology, Kunming 650093, China.

Corresponding author: Fei Wang, E-mail: feiwang@kust.edu.cn;

## Crystallographic Data Collection and Structure Determination

Single-crystal X-ray diffraction data of Ln-MOFs **1** and **2** were collected at 150(10) K using a Rigaku HyPix diffractometer with graphite-monochromatic Mo K $\alpha$  radiation ( $\lambda = 0.71073 \text{ \AA}$ ). An empirical absorption correction was applied using the SADABS program. The program Olex2 was used to solve the structures of Ln-MOFs **1** and **2**. All the structures were solved with ShelXT using intrinsic phasing and refined with full-matrix least-squares method on  $F^2$  by using the ShelXL refinement package. All non-hydrogen atoms were refined and treated anisotropically. The diffraction contribution of disordered solvent molecules in the structure were removed by the PLATON/SQUEEZE. The Ln-MOFs **1** and **2** topological type was explored from the crystallographic data with TOPOS Pro software.

**Table S1.** Crystallographic data and structure refinement for **1** and **2**

| <b>Compound</b>                                | <b>1</b>                                                                        | <b>2</b>                                                                         |
|------------------------------------------------|---------------------------------------------------------------------------------|----------------------------------------------------------------------------------|
| CCDC number                                    | 2106266                                                                         | 2106267                                                                          |
| Formula                                        | C <sub>21</sub> H <sub>24</sub> Br <sub>3</sub> EuN <sub>3</sub> O <sub>9</sub> | C <sub>21</sub> H <sub>24</sub> Br <sub>3</sub> N <sub>3</sub> O <sub>9</sub> Tb |
| <i>D</i> <sub>calc.</sub> / g cm <sup>-3</sup> | 2.057                                                                           | 2.091                                                                            |
| $\mu$ /mm <sup>-1</sup>                        | 6.673                                                                           | 7.011                                                                            |
| Formula Weight                                 | 854.12                                                                          | 861.08                                                                           |
| Size/mm <sup>3</sup>                           | 0.12×0.11×0.10                                                                  | 0.12 × 0.11 × 0.10                                                               |
| <i>T</i> /K                                    | 149.98(10)                                                                      | 150.04(10)                                                                       |
| Crystal System                                 | triclinic                                                                       | triclinic                                                                        |
| Space Group                                    | <i>P</i> -1                                                                     | <i>P</i> -1                                                                      |
| <i>a</i> /Å                                    | 11.2941(2)                                                                      | 11.2415(3)                                                                       |
| <i>b</i> /Å                                    | 11.5981(2)                                                                      | 11.5520(3)                                                                       |
| <i>c</i> /Å                                    | 12.9541(3)                                                                      | 12.9279(4)                                                                       |
| $\alpha$ /°                                    | 108.813(2)                                                                      | 109.079(3)                                                                       |
| $\beta$ /°                                     | 114.558(2)                                                                      | 114.551(3)                                                                       |
| $\gamma$ /°                                    | 98.648(2)                                                                       | 97.782(2)                                                                        |
| <i>V</i> /Å <sup>3</sup>                       | 1378.90(5)                                                                      | 1369.46(8)                                                                       |
| <i>Z</i>                                       | 2                                                                               | 2                                                                                |
| Wavelength/Å                                   | 0.71073                                                                         | 0.71073                                                                          |
| Radiation type                                 | Mo K $\alpha$                                                                   | Mo K $\alpha$                                                                    |
| $\theta_{min}$ /°                              | 1.912                                                                           | 1.913                                                                            |
| $\theta_{max}$ /°                              | 29.481                                                                          | 29.482                                                                           |
| Measured Refl's.                               | 30072                                                                           | 31328                                                                            |
| Refl's $I \geq 2\sigma(I)$                     | 5641                                                                            | 5384                                                                             |
| Indep't Refl's                                 | 6452                                                                            | 6425                                                                             |
| <i>R</i> <sub>int</sub>                        | 0.0364                                                                          | 0.0588                                                                           |
| Parameters                                     | 388                                                                             | 388                                                                              |
| Restraints                                     | 240                                                                             | 120                                                                              |
| Goof                                           | 1.051                                                                           | 1.065                                                                            |
| Final <i>R</i> indexes [ $I \geq 2\sigma(I)$ ] | <i>R</i> <sub>1</sub> =0.0233<br><i>wR</i> <sub>2</sub> =0.0464                 | <i>R</i> <sub>1</sub> =0.0414<br><i>wR</i> <sub>2</sub> =0.1041                  |
| Final <i>R</i> indexes [all data]              | <i>R</i> <sub>1</sub> =0.0303<br><i>wR</i> <sub>2</sub> =0.0481                 | <i>R</i> <sub>1</sub> =0.0530<br><i>wR</i> <sub>2</sub> =0.1094                  |

**Table S2.** Selected Bond Lengths (Å) and Angles (°) for **1**.

|                                        |            |                       |          |
|----------------------------------------|------------|-----------------------|----------|
| Eu1-O1                                 | 2.3645(17) | N2-C16                | 1.320(4) |
| Eu1-O1 <sup>i</sup>                    | 2.6528(17) | N2-C17                | 1.462(5) |
| Eu1-O2 <sup>i</sup>                    | 2.5144(19) | N2-C18                | 1.447(5) |
| Eu1-O3 <sup>ii</sup>                   | 2.4555(19) | C1-C2                 | 1.385(4) |
| Eu1-O4 <sup>ii</sup>                   | 2.4925(19) | C1-C6                 | 1.394(4) |
| Eu1-O5                                 | 2.3781(17) | C1-C7                 | 1.501(4) |
| Eu1-O6 <sup>i</sup>                    | 2.4161(18) | C2-C3                 | 1.372(4) |
| Eu1-O7                                 | 2.4238(17) | C3-C4                 | 1.401(4) |
| Eu1-O8                                 | 2.4417(19) | C4-C5                 | 1.399(4) |
| Br1-C2                                 | 1.904(3)   | C4-C8                 | 1.510(4) |
| Br2-C5                                 | 1.900(3)   | C5-C6                 | 1.384(4) |
| Br3-C10                                | 1.902(3)   | C9-C10                | 1.388(3) |
| O1-C7                                  | 1.259(3)   | C9-C11 <sup>iii</sup> | 1.394(4) |
| O2-C7                                  | 1.248(3)   | C9-C12                | 1.513(3) |
| O3-C8                                  | 1.257(3)   | C10-C11               | 1.384(4) |
| O4-C8                                  | 1.255(3)   | O9-C19                | 1.177(7) |
| O5-C12                                 | 1.258(3)   | N3-C19                | 1.351(7) |
| O6-C12                                 | 1.257(3)   | N3-C20                | 1.458(7) |
| O7-C13                                 | 1.229(3)   | N3-C21                | 1.452(7) |
| O8-C16                                 | 1.236(3)   | N3A-C19A              | 1.381(8) |
| N1-C13                                 | 1.325(4)   | N3A-C20A              | 1.469(8) |
| N1-C14                                 | 1.443(5)   | N3A-C21A              | 1.435(8) |
| N1-C15                                 | 1.440(5)   | O9A-C19A              | 1.191(8) |
| O1-Eu1-O1 <sup>i</sup>                 | 71.05(6)   | C16-N2-C17            | 120.8(3) |
| O1-Eu1-O2 <sup>i</sup>                 | 121.13(6)  | C16-N2-C18            | 121.0(3) |
| O1-Eu1-O3 <sup>ii</sup>                | 84.46(6)   | C18-N2-C17            | 118.1(3) |
| O1-Eu1-O4 <sup>ii</sup>                | 75.86(6)   | C2-C1-C6              | 117.7(2) |
| O1-Eu1-O5                              | 74.85(6)   | C2-C1-C7              | 123.0(2) |
| O1-Eu1-O6 <sup>i</sup>                 | 75.14(6)   | C6-C1-C7              | 119.3(2) |
| O1-Eu1-O7                              | 144.58(6)  | C1-C2-Br1             | 119.6(2) |
| O1-Eu1-O8                              | 140.49(6)  | C3-C2-Br1             | 118.8(2) |
| O2 <sup>i</sup> -Eu1-O1 <sup>i</sup>   | 50.09(5)   | C3-C2-C1              | 121.6(2) |
| O3 <sup>ii</sup> -Eu1-O1 <sup>i</sup>  | 148.65(6)  | C2-C3-C4              | 121.2(2) |
| O3 <sup>ii</sup> -Eu1-O2 <sup>i</sup>  | 147.99(6)  | C3-C4-C8              | 116.1(2) |
| O3 <sup>ii</sup> -Eu1-O4 <sup>ii</sup> | 52.55(6)   | C5-C4-C3              | 117.3(2) |
| O4 <sup>ii</sup> -Eu1-O1 <sup>i</sup>  | 133.71(6)  | C5-C4-C8              | 126.6(2) |
| O4 <sup>ii</sup> -Eu1-O2 <sup>i</sup>  | 145.93(6)  | C4-C5-Br2             | 124.1(2) |
| O5-Eu1-O1 <sup>i</sup>                 | 67.29(6)   | C6-C5-Br2             | 115.0(2) |
| O5-Eu1-O2 <sup>i</sup>                 | 82.60(6)   | C6-C5-C4              | 120.9(2) |

|                                       |            |                            |            |
|---------------------------------------|------------|----------------------------|------------|
| O5-Eu1-O3 <sup>ii</sup>               | 125.52(6)  | C5-C6-C1                   | 121.2(2)   |
| O5-Eu1-O4 <sup>ii</sup>               | 73.49(6)   | O1-C7-Eu1 <sup>i</sup>     | 64.09(13)  |
| O5-Eu1-O6 <sup>i</sup>                | 133.16(6)  | O1-C7-C1                   | 118.5(2)   |
| O5-Eu1-O7                             | 140.50(6)  | O2-C7-Eu1 <sup>i</sup>     | 57.71(13)  |
| O5-Eu1-O8                             | 73.05(6)   | O2-C7-O1                   | 121.8(2)   |
| O6 <sup>i</sup> -Eu1-O1 <sup>i</sup>  | 69.36(6)   | O2-C7-C1                   | 119.7(2)   |
| O6 <sup>i</sup> -Eu1-O2 <sup>i</sup>  | 83.13(6)   | C1-C7-Eu1 <sup>i</sup>     | 177.36(17) |
| O6 <sup>i</sup> -Eu1-O3 <sup>ii</sup> | 85.95(6)   | O3-C8-Eu1 <sup>ii</sup>    | 59.84(13)  |
| O6 <sup>i</sup> -Eu1-O4 <sup>ii</sup> | 130.94(6)  | O3-C8-C4                   | 118.4(2)   |
| O6 <sup>i</sup> -Eu1-O7               | 75.07(6)   | O4-C8-Eu1 <sup>ii</sup>    | 61.52(14)  |
| O6 <sup>i</sup> -Eu1-O8               | 144.37(6)  | O4-C8-O3                   | 121.4(2)   |
| O7-Eu1-O1 <sup>i</sup>                | 114.83(6)  | O4-C8-C4                   | 120.2(2)   |
| O7-Eu1-O2 <sup>i</sup>                | 73.37(6)   | C4-C8-Eu1 <sup>ii</sup>    | 178.18(18) |
| O7-Eu1-O3 <sup>ii</sup>               | 74.76(6)   | C10-C9-C11 <sup>iii</sup>  | 117.9(2)   |
| O7-Eu1-O4 <sup>ii</sup>               | 110.97(6)  | C10-C9-C12                 | 124.5(2)   |
| O7-Eu1-O8                             | 71.20(6)   | C11 <sup>iii</sup> -C9-C12 | 117.6(2)   |
| O8-Eu1-O1 <sup>i</sup>                | 115.46(6)  | C9-C10-Br3                 | 120.22(19) |
| O8-Eu1-O2 <sup>i</sup>                | 76.65(7)   | C11-C10-Br3                | 118.05(19) |
| O8-Eu1-O3 <sup>ii</sup>               | 95.87(7)   | C11-C10-C9                 | 121.7(2)   |
| O8-Eu1-O4 <sup>ii</sup>               | 73.40(7)   | C10-C11-C9 <sup>iii</sup>  | 120.5(2)   |
| Eu1-O1-Eu1 <sup>i</sup>               | 108.95(6)  | O5-C12-C9                  | 114.5(2)   |
| C7-O1-Eu1 <sup>i</sup>                | 90.64(15)  | O6-C12-O5                  | 127.3(2)   |
| C7-O1-Eu1                             | 160.36(17) | O6-C12-C9                  | 118.2(2)   |
| C7-O2-Eu1 <sup>i</sup>                | 97.48(15)  | O7-C13-N1                  | 124.8(3)   |
| C8-O3-Eu1 <sup>ii</sup>               | 93.88(15)  | O8-C16-N2                  | 124.9(3)   |
| C8-O4-Eu1 <sup>ii</sup>               | 92.21(16)  | C19-N3-C20                 | 118.9(7)   |
| C12-O5-Eu1                            | 138.50(16) | C19-N3-C21                 | 121.4(6)   |
| C12-O6-Eu1 <sup>i</sup>               | 135.86(15) | C21-N3-C20                 | 119.5(6)   |
| C13-O7-Eu1                            | 125.31(18) | O9-C19-N3                  | 123.5(7)   |
| C16-O8-Eu1                            | 123.83(18) | C19A-N3A-C20A              | 120.7(8)   |
| C13-N1-C14                            | 121.2(3)   | C19A-N3A-C21A              | 119.7(8)   |
| C13-N1-C15                            | 121.6(3)   | C21A-N3A-C20A              | 119.5(8)   |
| C15-N1-C14                            | 117.1(3)   | O9A-C19A-N3A               | 124.4(8)   |

Symmetry codes: (i) 1-X, -Y, 1-Z; (ii) 1-X, 1-Y, 1-Z; (iii) -X, -Y, 1-Z

**Table S3.** Selected Bond Lengths (Å) and Angles (°) for 2

|                                        |            |                        |           |
|----------------------------------------|------------|------------------------|-----------|
| Tb1-O1                                 | 2.335(3)   | N2-C16                 | 1.313(7)  |
| Tb1-O1 <sup>i</sup>                    | 2.650(3)   | N2-C17                 | 1.440(7)  |
| Tb1-O2 <sup>i</sup>                    | 2.483(3)   | N2-C18                 | 1.455(7)  |
| Tb1-O3 <sup>ii</sup>                   | 2.475(3)   | C1-C2                  | 1.385(6)  |
| Tb1-O4 <sup>ii</sup>                   | 2.434(3)   | C1-C6                  | 1.383(6)  |
| Tb1-O5                                 | 2.350(3)   | C1-C7                  | 1.509(6)  |
| Tb1-O6 <sup>i</sup>                    | 2.387(3)   | C2-C3                  | 1.390(6)  |
| Tb1-O7                                 | 2.421(3)   | C3-C4                  | 1.391(6)  |
| Tb1-O8                                 | 2.397(3)   | C4-C5                  | 1.405(6)  |
| Br1-C2                                 | 1.895(5)   | C4-C8                  | 1.507(6)  |
| Br2-C5                                 | 1.901(5)   | C5-C6                  | 1.386(6)  |
| Br3-C12                                | 1.902(4)   | C9-C10                 | 1.525(6)  |
| O1-C7                                  | 1.255(6)   | C10-C11                | 1.390(6)  |
| O2-C7                                  | 1.245(6)   | C10-C12 <sup>iii</sup> | 1.391(6)  |
| O3-C8                                  | 1.254(6)   | C11-C12                | 1.382(6)  |
| O4-C8                                  | 1.261(6)   | O9-C19                 | 1.175(18) |
| O5-C9                                  | 1.251(6)   | N3-C19                 | 1.35(2)   |
| O6-C9                                  | 1.261(6)   | N3-C20                 | 1.42(2)   |
| O7-C13                                 | 1.241(6)   | N3-C21                 | 1.422(19) |
| O8-C16                                 | 1.227(6)   | O9A-C19A               | 1.194(17) |
| N1-C13                                 | 1.316(7)   | C19A-N3A               | 1.35(2)   |
| N1-C14                                 | 1.459(8)   | N3A-C20A               | 1.458(18) |
| N1-C15                                 | 1.448(8)   | N3A-C21A               | 1.43(3)   |
| O1-Tb1-O1 <sup>i</sup>                 | 71.01(11)  | C16-N2-C17             | 121.1(6)  |
| O1-Tb1-O2 <sup>i</sup>                 | 121.43(11) | C16-N2-C18             | 121.6(5)  |
| O1-Tb1-O3 <sup>ii</sup>                | 75.74(11)  | C17-N2-C18             | 117.2(5)  |
| O1-Tb1-O4 <sup>ii</sup>                | 84.06(12)  | C2-C1-C7               | 122.0(4)  |
| O1-Tb1-O5                              | 75.18(11)  | C6-C1-C2               | 118.8(4)  |
| O1-Tb1-O6 <sup>i</sup>                 | 75.17(11)  | C6-C1-C7               | 119.2(4)  |
| O1-Tb1-O7                              | 140.86(11) | C1-C2-Br1              | 120.6(3)  |
| O1-Tb1-O8                              | 144.23(11) | C1-C2-C3               | 120.4(4)  |
| O2 <sup>i</sup> -Tb1-O1 <sup>i</sup>   | 50.42(10)  | C3-C2-Br1              | 119.0(3)  |
| O3 <sup>ii</sup> -Tb1-O1 <sup>i</sup>  | 133.70(11) | C2-C3-C4               | 121.7(4)  |
| O3 <sup>ii</sup> -Tb1-O2 <sup>i</sup>  | 145.82(11) | C3-C4-C5               | 117.1(4)  |
| O4 <sup>ii</sup> -Tb1-O1 <sup>i</sup>  | 147.82(12) | C3-C4-C8               | 116.3(4)  |
| O4 <sup>ii</sup> -Tb1-O2 <sup>i</sup>  | 147.79(11) | C5-C4-C8               | 126.6(4)  |
| O4 <sup>ii</sup> -Tb1-O3 <sup>ii</sup> | 53.08(11)  | C4-C5-Br2              | 123.8(3)  |
| O5-Tb1-O1 <sup>i</sup>                 | 67.14(10)  | C6-C5-Br2              | 115.3(3)  |
| O5-Tb1-O2 <sup>i</sup>                 | 82.13(11)  | C6-C5-C4               | 121.0(4)  |

|                                       |            |                             |           |
|---------------------------------------|------------|-----------------------------|-----------|
| O5-Tb1-O3 <sup>ii</sup>               | 73.91(11)  | C1-C6-C5                    | 121.0(4)  |
| O5-Tb1-O4 <sup>ii</sup>               | 126.41(11) | O1-C7-Tb1 <sup>i</sup>      | 65.1(2)   |
| O5-Tb1-O6 <sup>i</sup>                | 133.28(11) | O1-C7-C1                    | 118.1(4)  |
| O5-Tb1-O7                             | 73.33(11)  | O2-C7-Tb1 <sup>i</sup>      | 57.4(2)   |
| O5-Tb1-O8                             | 140.51(12) | O2-C7-O1                    | 122.5(4)  |
| O6 <sup>i</sup> -Tb1-O1 <sup>i</sup>  | 69.46(10)  | O2-C7-C1                    | 119.4(4)  |
| O6 <sup>i</sup> -Tb1-O2 <sup>i</sup>  | 83.49(11)  | C1-C7-Tb1 <sup>i</sup>      | 176.8(3)  |
| O6 <sup>i</sup> -Tb1-O3 <sup>ii</sup> | 130.69(11) | O3-C8-Tb1 <sup>ii</sup>     | 61.6(2)   |
| O6 <sup>i</sup> -Tb1-O4 <sup>ii</sup> | 84.99(11)  | O3-C8-O4                    | 121.4(4)  |
| O6 <sup>i</sup> -Tb1-O7               | 143.96(12) | O3-C8-C4                    | 120.3(4)  |
| O6 <sup>i</sup> -Tb1-O8               | 74.73(11)  | O4-C8-Tb1 <sup>ii</sup>     | 59.8(2)   |
| O7-Tb1-O1 <sup>i</sup>                | 115.79(11) | O4-C8-C4                    | 118.3(4)  |
| O7-Tb1-O2 <sup>i</sup>                | 76.34(12)  | C4-C8-Tb1 <sup>ii</sup>     | 178.0(3)  |
| O7-Tb1-O3 <sup>ii</sup>               | 73.67(12)  | O5-C9-O6                    | 128.0(4)  |
| O7-Tb1-O4 <sup>ii</sup>               | 96.39(12)  | O5-C9-C10                   | 114.8(4)  |
| O8-Tb1-O1 <sup>i</sup>                | 114.90(10) | O6-C9-C10                   | 117.1(4)  |
| O8-Tb1-O2 <sup>i</sup>                | 73.46(11)  | C11-C10-C9                  | 117.3(4)  |
| O8-Tb1-O3 <sup>ii</sup>               | 110.98(12) | C11-C10-C12 <sup>iii</sup>  | 118.3(4)  |
| O8-Tb1-O4 <sup>ii</sup>               | 74.51(12)  | C12 <sup>iii</sup> -C10-C9  | 124.3(4)  |
| O8-Tb1-O7                             | 71.06(12)  | C12-C11-C10                 | 120.1(4)  |
| Tb1-O1-Tb1 <sup>i</sup>               | 108.99(11) | C10 <sup>iii</sup> -C12-Br3 | 120.1(3)  |
| C7-O1-Tb1                             | 161.5(3)   | C11-C12-Br3                 | 118.3(3)  |
| C7-O1-Tb1 <sup>i</sup>                | 89.5(3)    | C11-C12-C10 <sup>iii</sup>  | 121.6(4)  |
| C7-O2-Tb1 <sup>i</sup>                | 97.6(3)    | O7-C13-N1                   | 124.5(5)  |
| C8-O3-Tb1 <sup>ii</sup>               | 91.9(3)    | O8-C16-N2                   | 125.8(5)  |
| C8-O4-Tb1 <sup>ii</sup>               | 93.6(3)    | C19-N3-C20                  | 121.3(15) |
| C9-O5-Tb1                             | 138.4(3)   | C19-N3-C21                  | 120.7(16) |
| C9-O6-Tb1 <sup>i</sup>                | 135.3(3)   | C20-N3-C21                  | 117.8(15) |
| C13-O7-Tb1                            | 123.7(3)   | O9-C19-N3                   | 124.5(18) |
| C16-O8-Tb1                            | 126.1(3)   | O9A-C19A-N3A                | 126.7(16) |
| C13N1-C14                             | 120.7(6)   | C19A-N3A-C20A               | 122.0(14) |
| C13-N1-C15                            | 120.8(5)   | C19A-N3A-C21A               | 121.1(16) |
| C15-N1-C14                            | 118.5(5)   | C21A-N3A-C20A               | 116.8(16) |

Symmetry codes: (i) 1-X, -Y, 1-Z; (ii) 1-X, 1-Y, 1-Z; (iii) -X, -Y, 1-Z

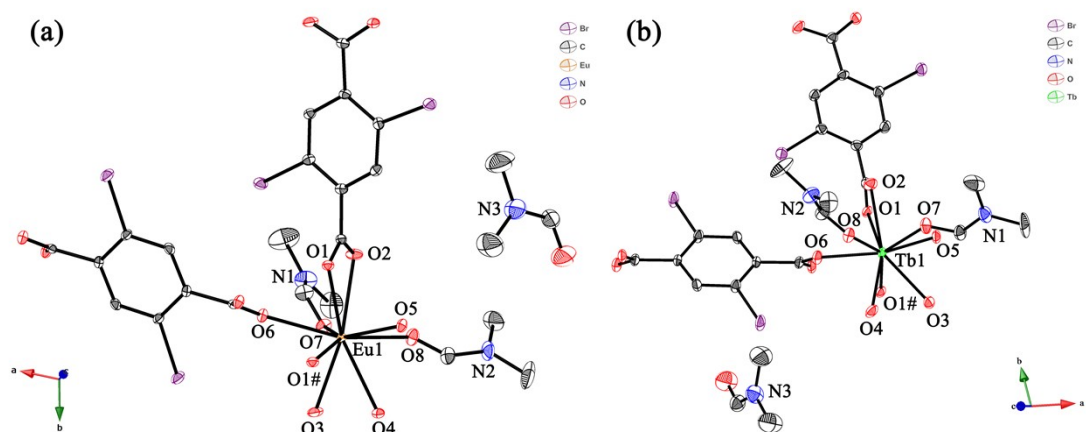

**Fig. S1** ORTEP diagrams of the structural unit **1** and **2** with partial atom numbering schemes, the thermal displacement ellipsoids are drawn at 40% probability. Hydrogen atoms have been omitted for clarity.

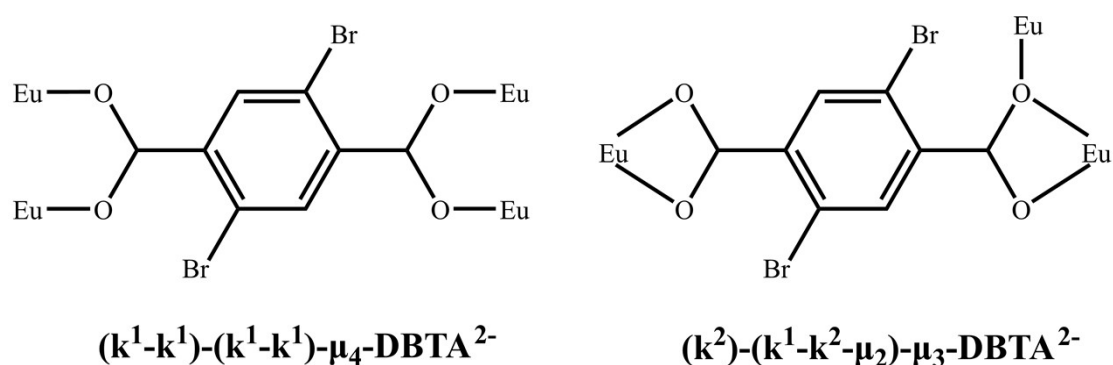

**Fig. S2** The coordination modes of  $\text{DBTA}^{2-}$  ligand.

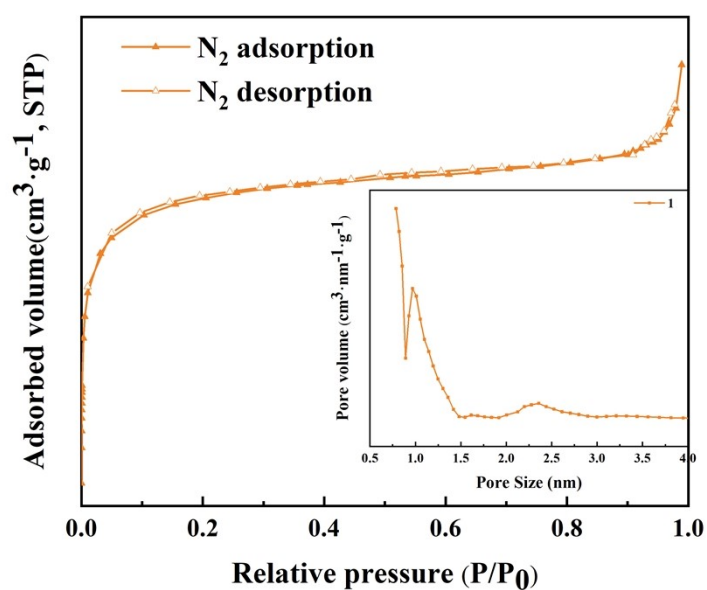

**Fig. S3**  $\text{N}_2$  adsorption-desorption isotherms of **1**, insert: Pore size distribution plot.



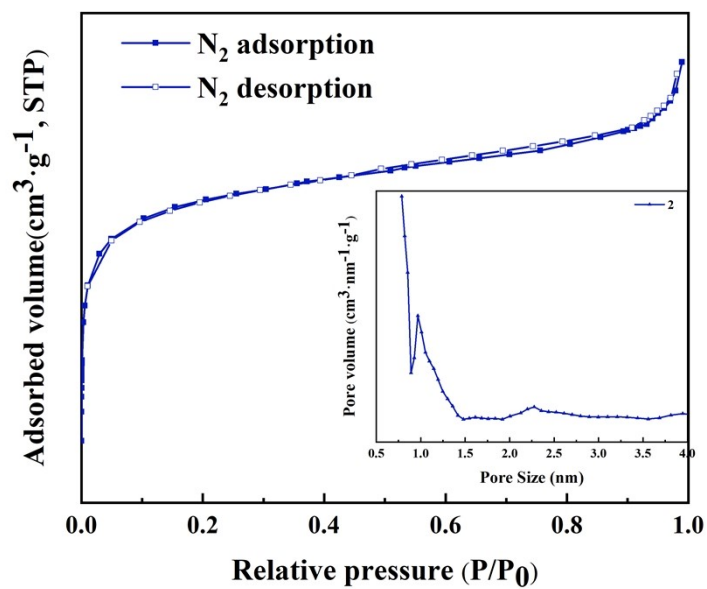

Fig. S4  $\text{N}_2$  adsorption-desorption isotherms of **2**, insert: Pore size distribution plot.

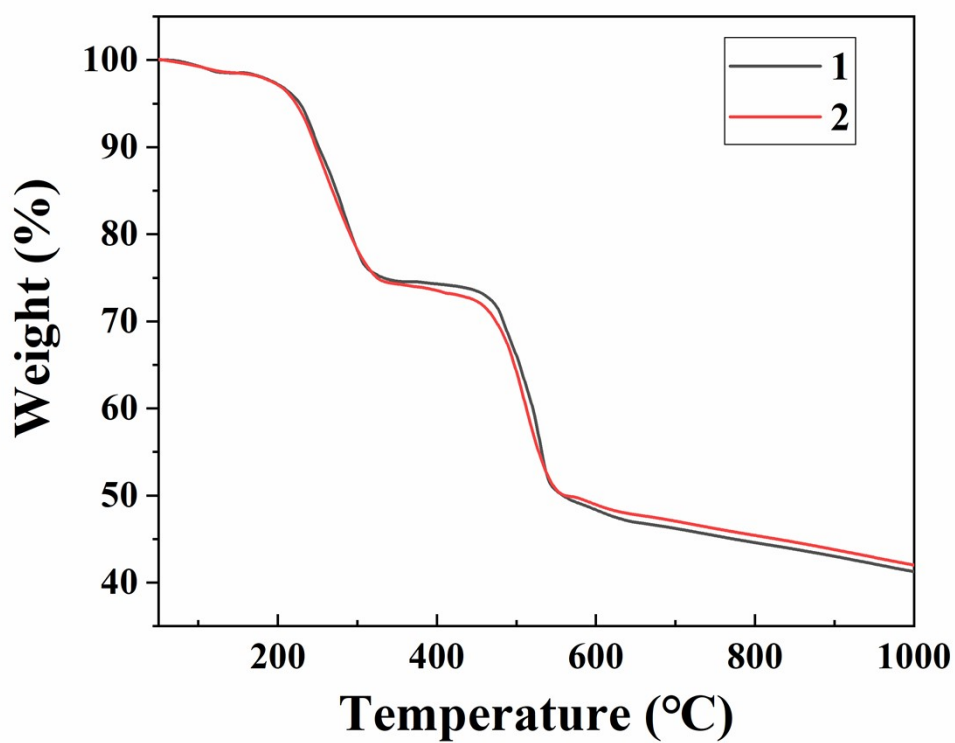

Fig. S5 Thermogravimetric curve of **1** and **2**.

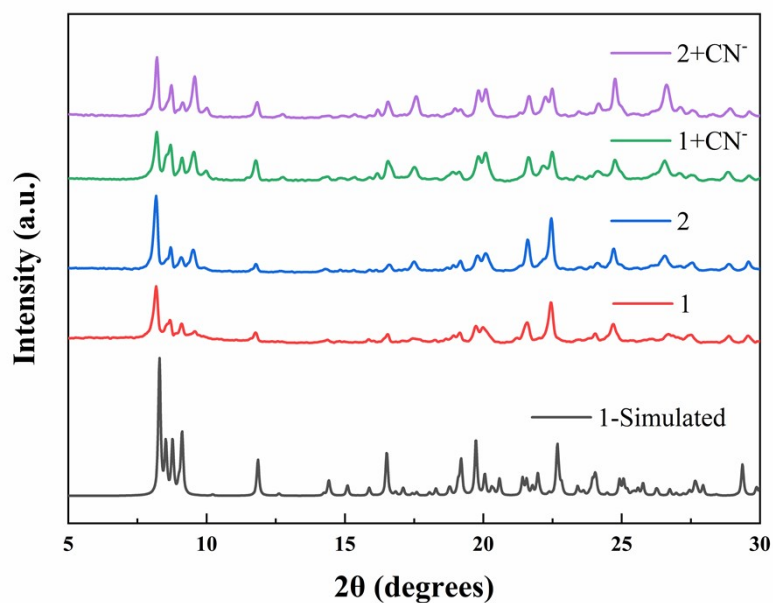

**Fig. S6** Simulated PXRD patterns of **1** and synthesized PXRD of compounds **1**, **2**, **1+CN<sup>-</sup>** and **2+CN<sup>-</sup>**.

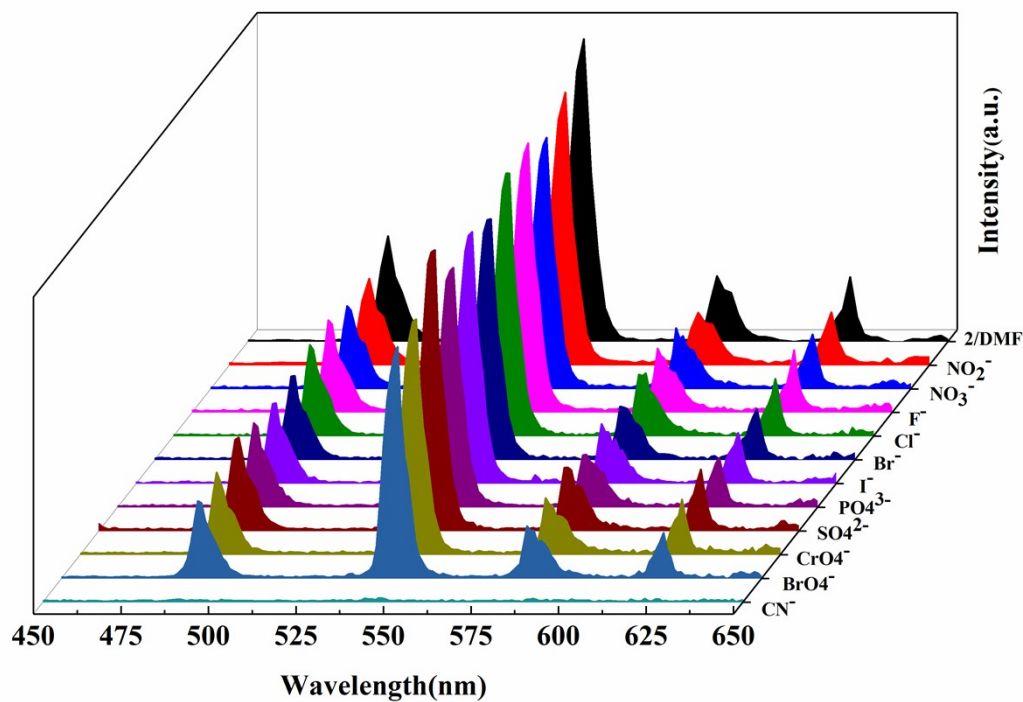

**Fig. S7** Emission spectra and luminescence intensity at 546 nm of **2/DMF** treated with different anions ( $\lambda_{\text{ex}}=303$  nm, 100  $\mu\text{g/mL}$ ).

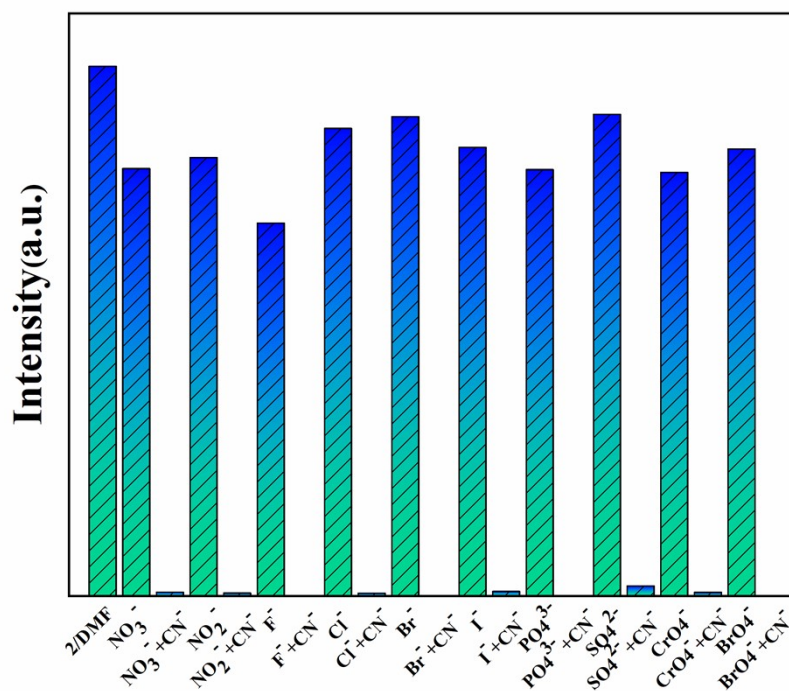

**Fig. S8** Comparison of the luminescence intensity (546 nm) of 2/DMF suspension dispersion mixed with interfering anions ( $\lambda_{\text{ex}}=303$  nm, 100  $\mu\text{g/mL}$ )

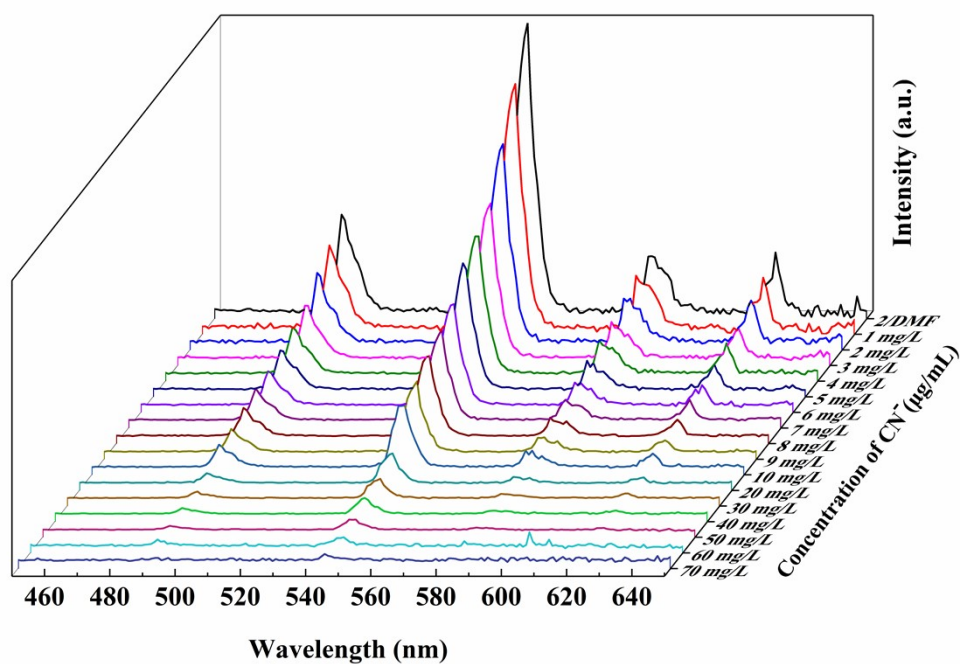

**Fig. S9** Emission spectra of 2/DMF with different concentrations of CN<sup>-</sup>(1-70  $\mu\text{g/mL}$ )

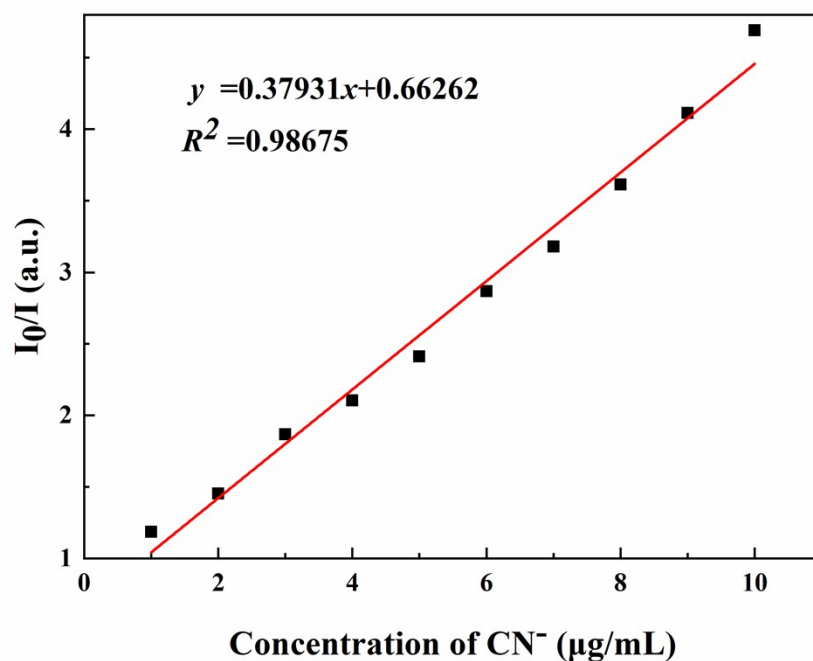

**Fig. S10** Relationship between  $I_0/I$  and different  $\text{CN}^-$  concentrations and Stern-Volmer formula fitting of **2** with concentrations of 1-10  $\mu\text{g/mL}$ .

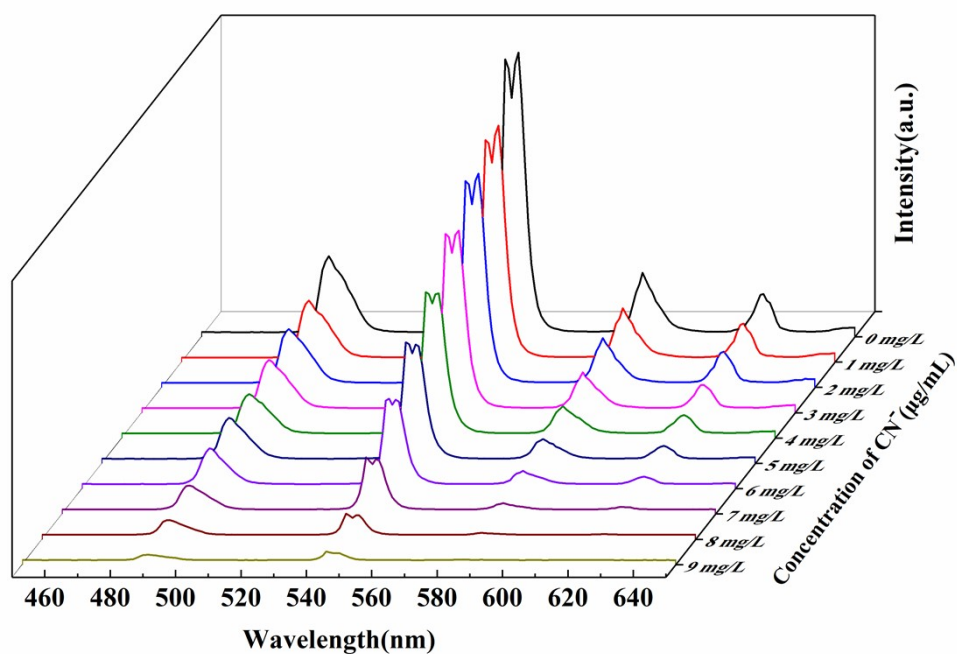

**Fig. S11** Emission spectra of **2** with different concentrations of  $\text{CN}^-$  (1-9  $\mu\text{g/mL}$ ) in aqueous solution.

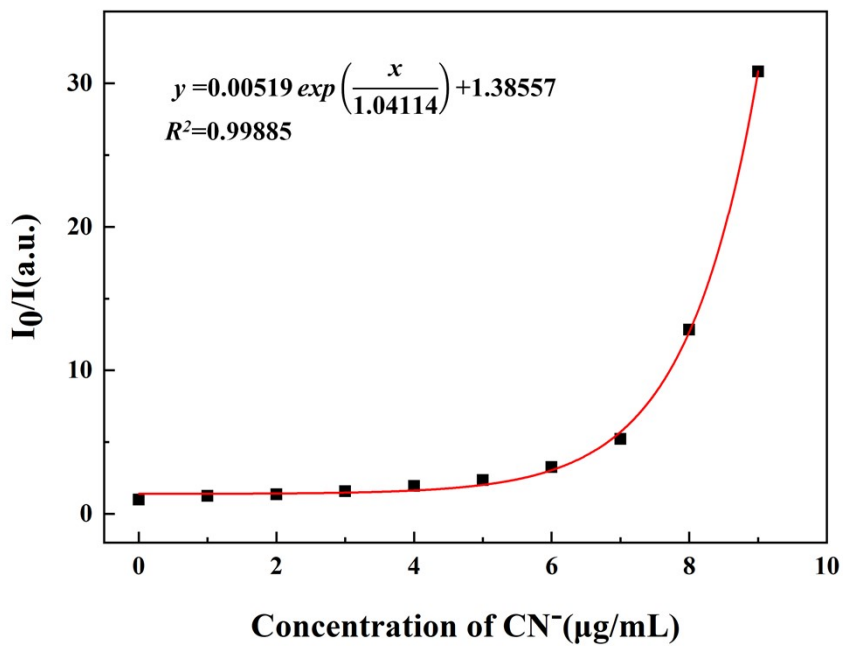

Fig. S12 Relationship between  $I_0/I$  and different  $CN^-$  concentrations of 2.

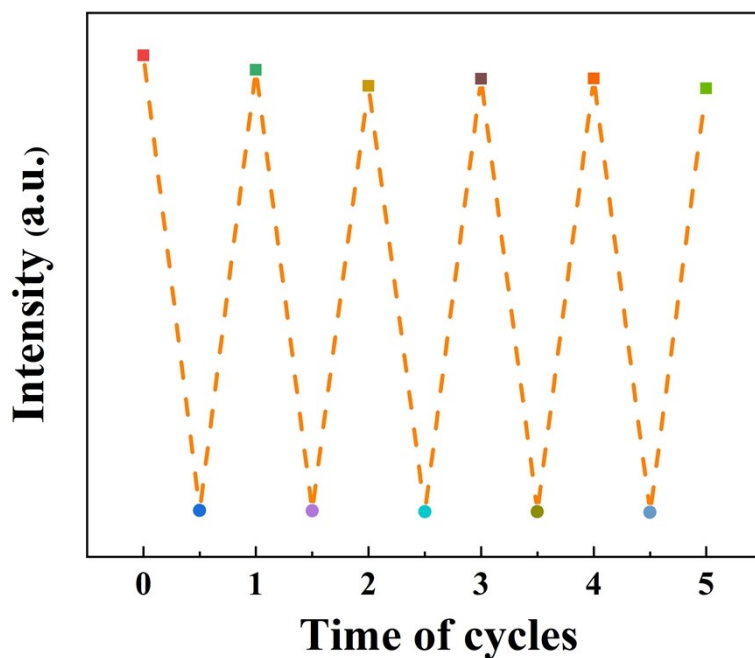

Fig. S13 Fluorescence intensity (619 nm) of 1 during five recycles.

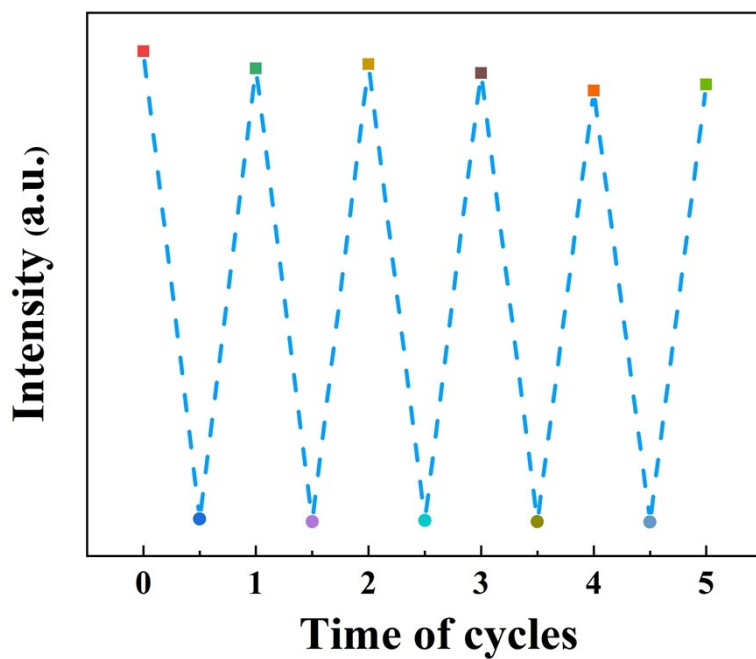

Fig. S14 Fluorescence intensity (546 nm) of 2 during five recycles.

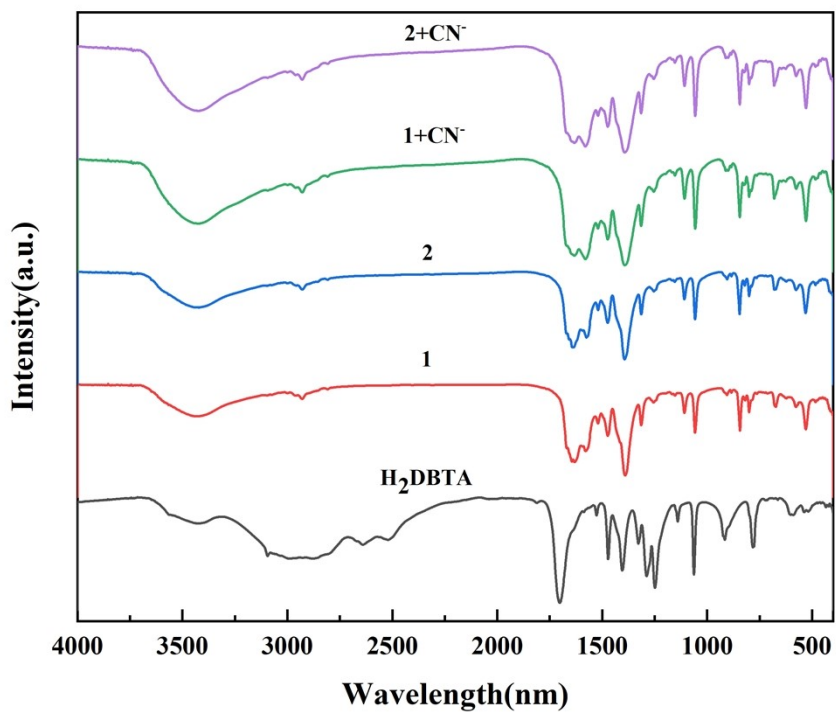

Fig. S15 FT-IR spectra of ligand, 1, 2, 1+CN<sup>-</sup> and 2+CN<sup>-</sup>.

**Table S4.** Comparison of the LOD values of CN<sup>-</sup> with other materials.

| Material                                                                                                                                               | Solvent                             | LOD      | Ref.      |
|--------------------------------------------------------------------------------------------------------------------------------------------------------|-------------------------------------|----------|-----------|
| <b>1</b>                                                                                                                                               | DMF                                 | 1.691 μM | This work |
| <b>2</b>                                                                                                                                               | DMF                                 | 8.307 μM | This work |
| 2-HPEAPB                                                                                                                                               | CH <sub>3</sub> CN-H <sub>2</sub> O | 8.0 μM   | 1         |
| [Hf <sub>6</sub> O <sub>4</sub> (OH) <sub>4</sub> (C <sub>8</sub> H <sub>2</sub> O <sub>4</sub> S <sub>2</sub> ) <sub>6</sub> ]·9H <sub>2</sub> O·2DMF | H <sub>2</sub> O                    | 0.35 μM  | 2         |
| 4-(p-tolyl)thiazol-2-amine and 2-hydroxy-1-naphthaldehyde                                                                                              | Bis-tris buffer/DMSO                | 19.4 μM  | 3         |
| 6,7-dihydroxycoumarin                                                                                                                                  | DMSO-water                          | 5.77 μM  | 4         |
| HBTM-HC                                                                                                                                                | DMSO                                | 1.38 μM  | 5         |
| triarylborane substituted bithiazole                                                                                                                   | THF                                 | 2.1 μM   | 6         |
| L                                                                                                                                                      | DMSO/H <sub>2</sub> O               | 6.4 μM   | 7         |
| M-ZIF-90                                                                                                                                               | H <sub>2</sub> O/DMSO               | 2 μM     | 8         |
| bio-MOF-1⊃DAAC                                                                                                                                         | H <sub>2</sub> O                    | 5.2 ppb  | 9         |
| TIP-Co                                                                                                                                                 | THF-H <sub>2</sub> O                | 89.3 nM  | 10        |
| CuCl <sub>2</sub> @MOF-867                                                                                                                             | H <sub>2</sub> O                    | 0.19 μM  | 11        |

## References

1. X. X. Ou, Y. L. Jin, X. Q. Chen, C. B. Gong, X. B. Ma, Y. S. Wang, C. F. Chow and Q. Tang, *Anal. Methods*, 2015, **7**, 5239-5244.
2. R. Dalapati, S. Nandi and S. Biswas, *Dalton Trans.*, 2020, **49**, 8684-8692.
3. S. M. Kim, M. Kang, I. Choi, J. J. Lee and C. Kim, *New J. Chem.*, 2016, **40**, 7768-7778.
4. R. Kaushik, A. Ghosh, A. Singh, P. Gupta, A. Mittal and D. A. Jose, *Acs Sensors*, 2016, **1**, 1265-1271.
5. L. Tang, L. Zhou, A. Liu, X. Yan, K. Zhong, X. Liu, X. Gao and J. Li, *Dyes Pigm.*, 2021, **186**, 109034.
6. R. Maragani, T. S. Reddy and R. Misra, *Tetrahedron Lett.*, 2016, **57**, 3853-3857.
7. Z. Li, C. Liu, S. Wang, L. Xiao and X. Jing, *Spectrochim. Acta, Part A*, 2019, **210**, 321-328.
8. A. Karmakar, N. Kumar, P. Samanta, A. V. Desai and S. K. Ghosh, *Chem. - Eur. J.*, 2016, **22**, 864-868.
9. A. Karmakar, B. Joarder, A. Mallick, P. Samanta, A. V. Desai, S. Basu and S. K. Ghosh, *Chem. Commun.*, 2017, **53**, 1253-1256.
10. Y. Liu, Q. Qiu, X. Zhang, K. Huang and D. Qin, *J. Solid State Chem.*, 2021, **300**, 122258.
11. D. Mahato, S. Fajal, P. Samanta, W. Mandal and S. K. Ghosh, *ChemPlusChem*, 2022, **87**, e202100426.
